# Supplementary material for: Nitrogen Supply and Leaf Age Affect the Expression of TaGS1 or TaGS2 Driven by a Constitutive Promoter in Transgenic Tobacco
Source: MDPI journal article supplement (doi:10.3390/genes9080406), 2018-08-10
Supplement: s1 [file s1]

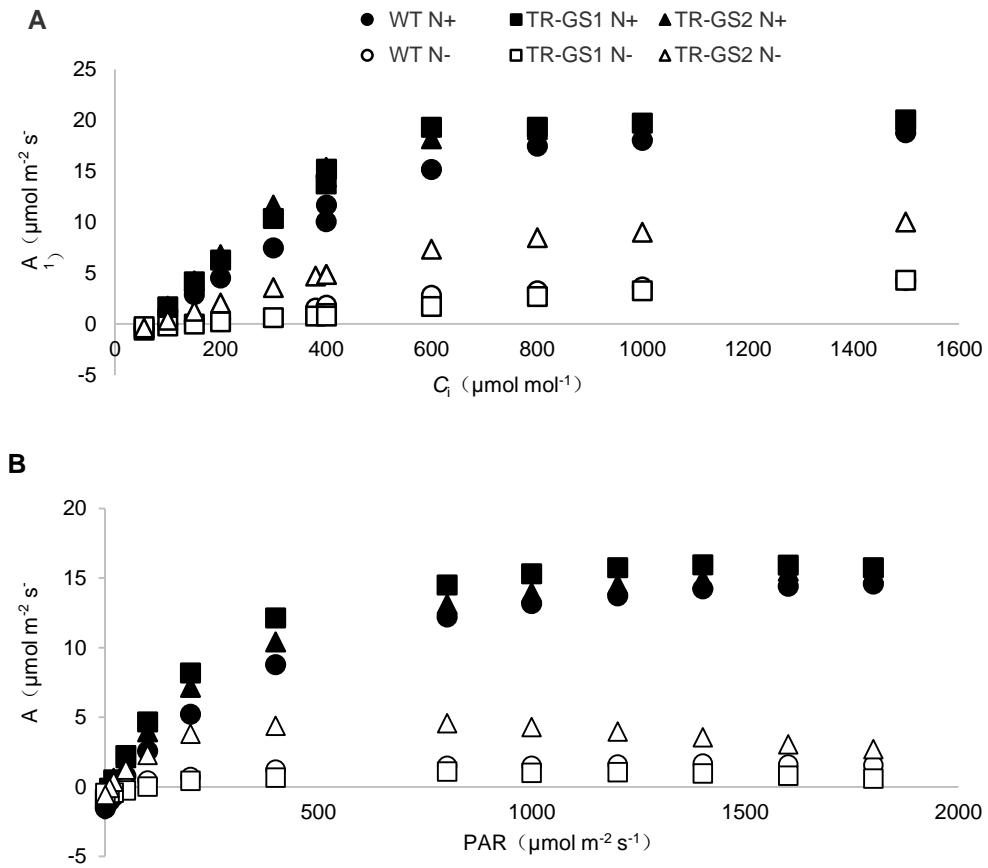

**Figure S4**  $\text{CO}_2$  response curve ( A ) and light response curve ( B ) of photosynthesis in the middle leaves from TR-GS1, TR-GS2, and WT plants grown under optimum nitrogen and nitrogen starvation conditions.
