# Supplementary material for: Nitrogen Supply and Leaf Age Affect the Expression of TaGS1 or TaGS2 Driven by a Constitutive Promoter in Transgenic Tobacco
Source: MDPI journal article supplement (doi:10.3390/genes9080406), 2018-08-10
Supplement: s1 [file s1]

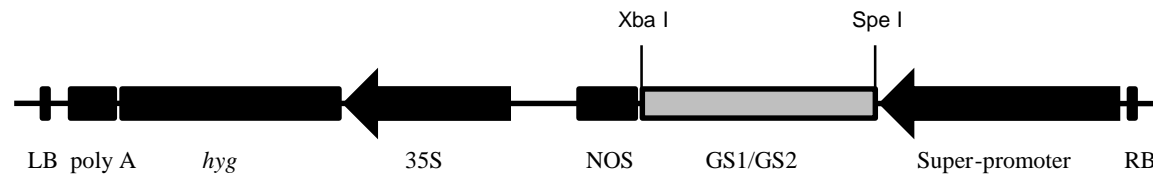

**Figure S1** Recombinant vector containing a derivative of the super-promoter, GS1 or GS2, and the NOS terminator between the right (RB) and left borders (LB) of the T-DNA. The hygromycin resistance gene (*hyg*) was located between the 35S promoter and poly-A tail.
