# Supplementary material for: Nitrogen Supply and Leaf Age Affect the Expression of TaGS1 or TaGS2 Driven by a Constitutive Promoter in Transgenic Tobacco
Source: MDPI journal article supplement (doi:10.3390/genes9080406), 2018-08-10
Supplement: s1 [file s1]

Upper leaves  
(Sink leaves,  
New leaves)

Middle leaves  
(Source leaves,  
Functional leaves)

Lower leaves  
(Source leaves,  
Senescing leaves)

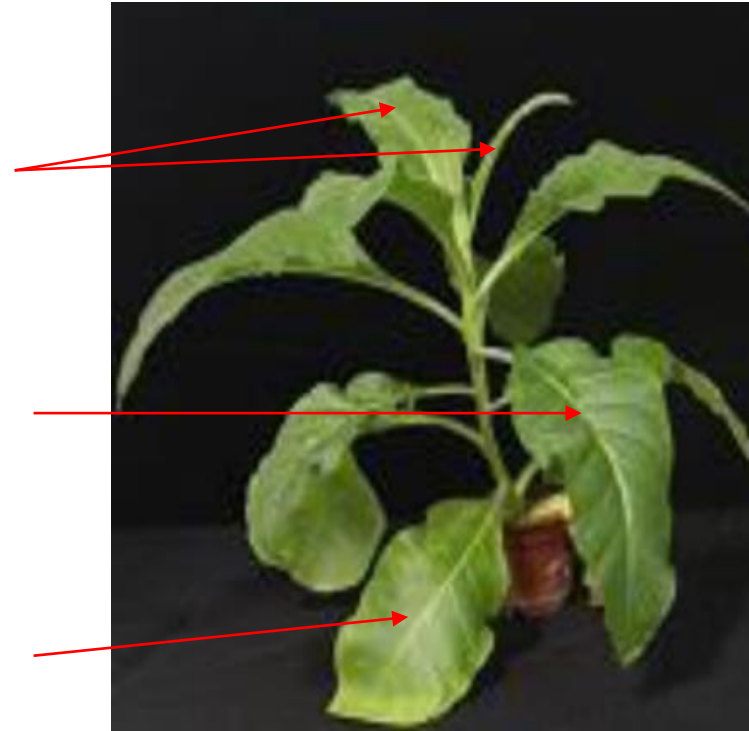

**Figure S2** Leaf strata designation of tobacco plants used in this study.
