# Supplementary material for: Nitrogen Supply and Leaf Age Affect the Expression of TaGS1 or TaGS2 Driven by a Constitutive Promoter in Transgenic Tobacco
Source: MDPI journal article supplement (doi:10.3390/genes9080406), 2018-08-10
Supplement: s1 [file s1]

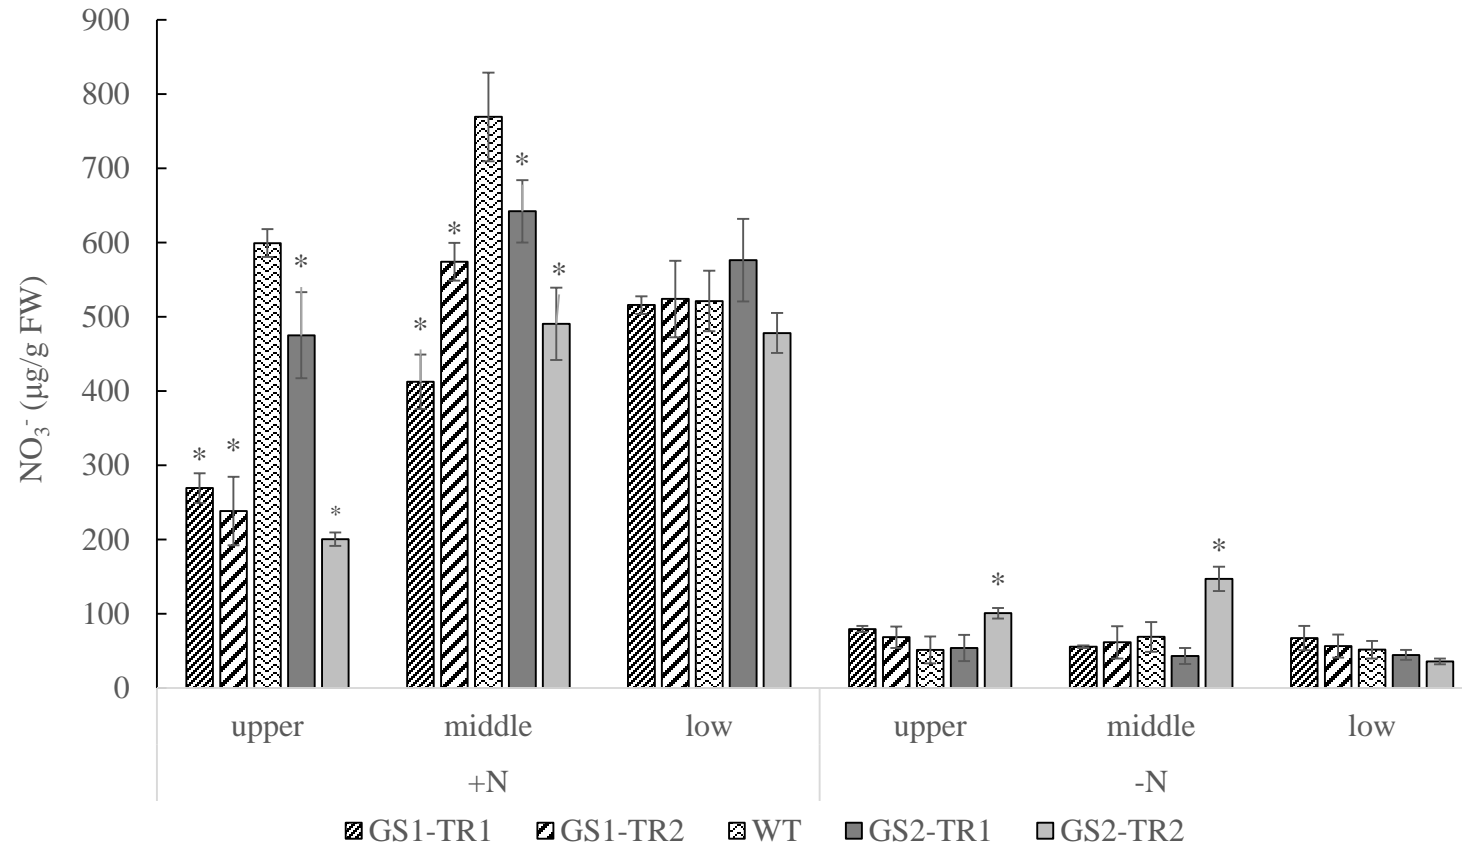

**Figure S3** The  $\text{NO}_3^-$  content in the upper, middle, and lower leaves of GS1-TR, GS2-TR, and the WT plants grown under nitrogen-sufficient and nitrogen-starvation conditions. Data are means of three independent biological replicates  $\pm$  SD. Asterisk indicate that the data is significantly different ( $p < 0.05$ ) from the data of WT plants.
